# Supplementary material for: Design, synthesis and biological activity of N4-phenylsubstituted-7H-pyrrolo[2,3-d]pyrimidin-4-amines as dual inhibitors of aurora kinase A and epidermal growth factor receptor kinase
Source: PubMed Central journal article supplement (PMC6009956; doi:10.1080/14756366.2017.1376666), 2017-11-08

## SUPPORTING INFORMATION

### Design, synthesis and biological activity of *N*<sup>4</sup>-phenylsubstituted-7*H*-pyrrolo[2,3-*d*]pyrimidin-4-amines as dual inhibitors of aurora kinase A and epidermal growth factor receptor kinase

Sonali Kurup,<sup>1\*</sup> Bradley McAllister,<sup>1</sup> Pavlina Liskova,<sup>1</sup> Trusha Mistry,<sup>1</sup> Anthony Fanizza,<sup>2</sup> Dan Stanford,<sup>2</sup> Jolanta Slawska,<sup>3</sup> Ulrich Keller,<sup>3,4</sup> Alexander Hoellein<sup>3</sup>

#### General procedures for determination of IC<sub>50</sub> values for compounds 1-8

Kinase activity was measured by quantifying the amount of ADP produced from the kinase reaction. The luminescent signal from the assay was correlated with the amount of ADP present and is directly correlated with the amount of kinase activity. Compounds **1-18** and staurosporine were diluted in 10% DMSO and 2.5 μl of the dilution was added to a 25 μl reaction so that the final concentration of DMSO is 1% in all of reactions. The 25 μl reaction mixture contained 40 mM Tris, pH 7.4, 10 mM MgCl<sub>2</sub>, 0.1 mg/ml BSA, 1 mM DTT, 10 μM ATP, Kinase substrate peptide, 10 μM ATP and the target kinase enzyme. EGFR reactions were conducted at 30 °C for 45 minutes using 0.2 mg/ml Poly (Glu, Tyr) as the EGFR substrate peptide and 5 ng of EGFR kinase. Aurora A reactions were done for 50 min at 30 °C using 0.2 mg/ml Kemptide and 220 ng of Aurora A kinase. After the kinase reaction at 30 °C, 25 μl of ADP-Glo reagent was added and incubated for 45 min at room temperature followed by another 40 min incubation with 50 μl of Kinase detection mixture. All luminescence signals were measured using a BioTek *Synergy 2* microplate reader. Kinase activity assays were performed in triplicate at each

concentration. The luminescence data were analyzed using the computer software, Graphpad Prism. The difference between luminescence intensities in the absence of Kinase ( $Lu_t$ ) and in the presence of Kinase ( $Lu_c$ ) was defined as 100 % activity ( $Lu_t - Lu_c$ ). Using luminescence signal ( $Lu$ ) in the presence of the compound, % activity was calculated as:

% activity =  $\{(Lu_t - Lu)/(Lu_t - Lu_c)\} \times 100\%$ , where  $Lu$ = the luminescence intensity in the presence of the compound. The values of % activity versus a series of compound concentrations were then plotted using non-linear regression analysis of Sigmoidal dose-response curve generated with the equation  $Y=B+(T-B)/1+10^{((\text{LogEC}_{50}-X) \times \text{Hill Slope})}$ , where  $Y$ =percent activity,  $B$ =minimum percent activity,  $T$ =maximum percent activity,  $X$ =logarithm of compound and Hill Slope=slope factor or Hill coefficient. The  $IC_{50}$  value was determined by the concentration causing a half-maximal percent activity.

### 3.1. Results of the Effect of the Compounds on Kinases

#### EGFR

**Table S1: Data for the Effect of SK-34 (compound 1) on EGFR Activity**

| SK-34<br>(Log [nM]) | EGFR Activity<br>Luminescence |      |      | % Activity |      |      |
|---------------------|-------------------------------|------|------|------------|------|------|
|                     | Set1                          | Set2 | Set3 | Set1       | Set2 | Set3 |
| No Compound         | 7698                          | 7680 | 8361 | 97         | 97   | 106  |
| 0                   | 8176                          | 7755 | 8129 | 103        | 98   | 103  |
| 1.0                 | 7979                          | 8710 | 8392 | 101        | 110  | 106  |
| 1.5                 | 7329                          | 7208 | 7428 | 92         | 91   | 94   |
| 2.0                 | 5247                          | 5646 | 6009 | 66         | 71   | 76   |
| 2.5                 | 3191                          | 3411 | 3245 | 39         | 42   | 40   |
| 3.0                 | 1985                          | 1862 | 1823 | 24         | 22   | 22   |
| 3.5                 | 811                           | 792  | 802  | 9          | 9    | 9    |
| 4.0                 | 446                           | 549  | 482  | 4          | 5    | 5    |
| 4.5                 | 257                           | 265  | 275  | 2          | 2    | 2    |
| 5.0                 | 201                           | 208  | 222  | 1          | 1    | 1    |
| Background          | 129                           | 121  | 131  |            |      |      |

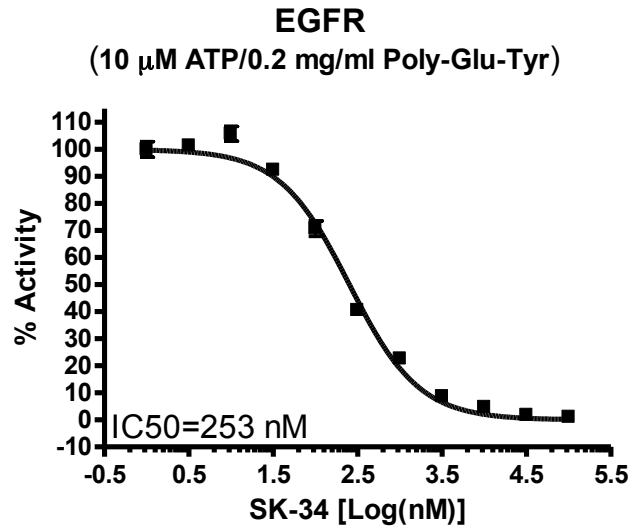

**Table S2: Data for the Effect of SK-18 (compound 2) on EGFR Activity**

| SK-18<br>(Log [nM]) | EGFR Activity<br>Luminescence |      |      | % Activity |      |      |
|---------------------|-------------------------------|------|------|------------|------|------|
|                     | Set1                          | Set2 | Set3 | Set1       | Set2 | Set3 |
| No Compound         | 8247                          | 8359 | 8110 | 100        | 101  | 98   |
| 0                   | 3604                          | 3492 | 3444 | 43         | 41   | 41   |
| 1.0                 | 2483                          | 2486 | 2407 | 29         | 29   | 28   |
| 1.5                 | 1042                          | 888  | 1009 | 11         | 9    | 11   |
| 2.0                 | 595                           | 576  | 606  | 6          | 6    | 6    |
| 2.5                 | 363                           | 316  | 330  | 3          | 2    | 3    |
| 3.0                 | 235                           | 217  | 240  | 1          | 1    | 1    |
| 3.5                 | 184                           | 183  | 161  | 1          | 1    | 0    |
| 4.0                 | 135                           | 130  | 143  | 0          | 0    | 0    |
| 4.5                 | 149                           | 133  | 112  | 0          | 0    | 0    |
| 5.0                 | 123                           | 164  | 128  | 0          | 0    | 0    |
| Background          | 119                           | 134  | 126  |            |      |      |

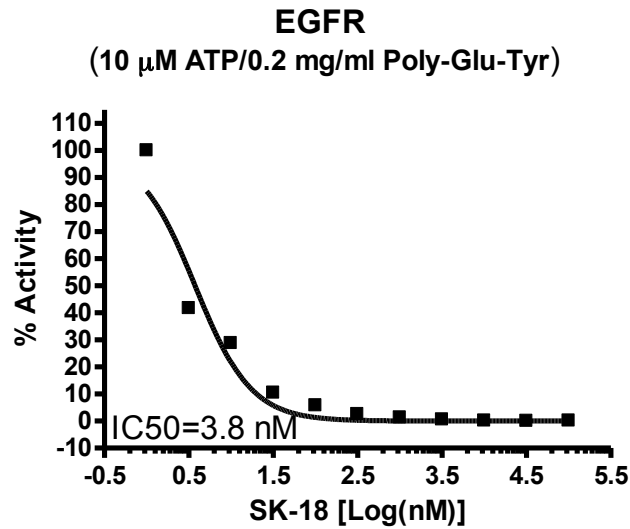

**Table S3: Data for the Effect of SK-17 (compound 3) on EGFR Activity**

| SK-17<br>(Log [nM]) | EGFR Activity<br>Luminescence |      |      | % Activity |      |      |
|---------------------|-------------------------------|------|------|------------|------|------|
|                     | Set1                          | Set2 | Set3 | Set1       | Set2 | Set3 |
| No Compound         | 8572                          | 8464 | 7927 | 103        | 102  | 95   |
| 0                   | 4808                          | 4889 | 4706 | 57         | 58   | 56   |
| 1.0                 | 3202                          | 3158 | 3419 | 38         | 37   | 40   |
| 1.5                 | 1210                          | 1432 | 1434 | 13         | 16   | 16   |
| 2.0                 | 695                           | 683  | 781  | 7          | 7    | 8    |
| 2.5                 | 328                           | 416  | 405  | 2          | 4    | 3    |
| 3.0                 | 231                           | 245  | 260  | 1          | 1    | 2    |
| 3.5                 | 162                           | 185  | 165  | 0          | 1    | 0    |
| 4.0                 | 136                           | 153  | 143  | 0          | 0    | 0    |
| 4.5                 | 133                           | 131  | 131  | 0          | 0    | 0    |
| 5.0                 | 132                           | 141  | 128  | 0          | 0    | 0    |
| Background          | 127                           | 116  | 132  |            |      |      |

**EGFR**  
(10  $\mu$ M ATP/0.2 mg/ml Poly-Glu-Tyr)

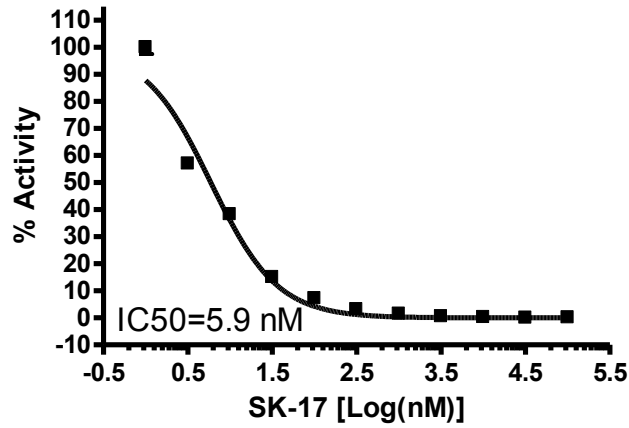

**Table S4: Data for the Effect of TM-9 (compound 4) on EGFR Activity**

| TM-9<br>(Log [nM]) | EGFR Activity<br>Luminescence |      |      | % Activity |      |      |
|--------------------|-------------------------------|------|------|------------|------|------|
|                    | Set1                          | Set2 | Set3 | Set1       | Set2 | Set3 |
| No Compound        | 7106                          | 7597 | 7685 | 95         | 102  | 103  |
| 0                  | 7599                          | 7194 | 7272 | 102        | 96   | 97   |
| 1.0                | 7608                          | 7225 | 7193 | 102        | 97   | 96   |
| 1.5                | 4897                          | 4575 | 4833 | 65         | 61   | 64   |
| 2.0                | 3785                          | 3448 | 3952 | 50         | 45   | 52   |
| 2.5                | 1550                          | 1517 | 1712 | 19         | 19   | 22   |
| 3.0                | 888                           | 869  | 975  | 10         | 10   | 12   |
| 3.5                | 403                           | 433  | 440  | 4          | 4    | 4    |
| 4.0                | 254                           | 257  | 260  | 2          | 2    | 2    |
| 4.5                | 184                           | 182  | 163  | 1          | 1    | 1    |
| 5.0                | 159                           | 175  | 179  | 1          | 1    | 1    |
| Background         | 107                           | 135  | 117  |            |      |      |

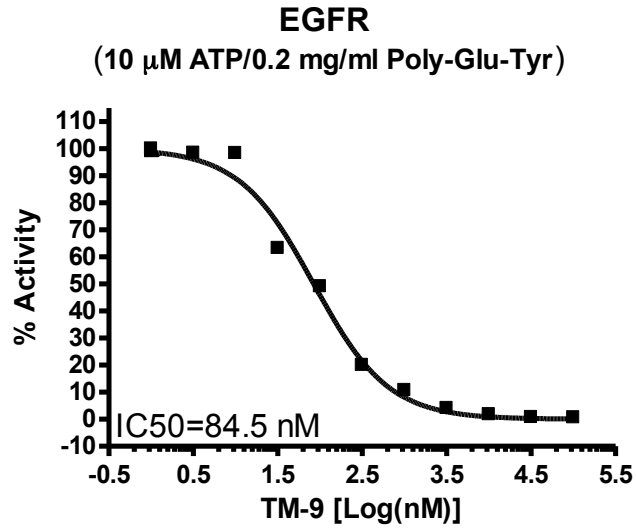

**Table S5: Data for the Effect of SK-32 (compound 5) on Kinase Activity**

| SK-32<br>(Log [nM]) | EGFR Activity<br>Luminescence |      |      | % Activity |      |      |
|---------------------|-------------------------------|------|------|------------|------|------|
|                     | Set1                          | Set2 | Set3 | Set1       | Set2 | Set3 |
| No Compound         | 7168                          | 7732 | 7684 | 95         | 103  | 102  |
| 0                   | 3874                          | 4474 | 4386 | 51         | 59   | 58   |
| 1.0                 | 3328                          | 3535 | 3663 | 43         | 46   | 48   |
| 1.5                 | 1189                          | 1284 | 1269 | 14         | 16   | 16   |
| 2.0                 | 714                           | 768  | 780  | 8          | 9    | 9    |
| 2.5                 | 359                           | 398  | 459  | 3          | 4    | 5    |
| 3.0                 | 235                           | 253  | 242  | 2          | 2    | 2    |
| 3.5                 | 163                           | 165  | 165  | 1          | 1    | 1    |
| 4.0                 | 123                           | 131  | 213  | 0          | 0    | 1    |
| 4.5                 | 125                           | 133  | 138  | 0          | 0    | 0    |
| 5.0                 | 122                           | 313  | 158  | 0          | 3    | 1    |
| Background          | 114                           | 119  | 111  |            |      |      |

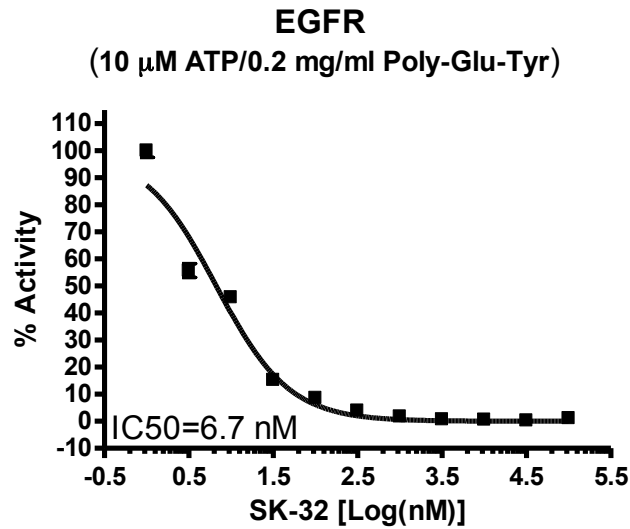

**Table S6: Data for the Effect of BM-7 (compound 6) on EGFR Kinase Activity**

| BM-7<br>(Log [nM]) | EGFR Activity<br>Luminescence |      |      | % Activity |      |      |
|--------------------|-------------------------------|------|------|------------|------|------|
|                    | Set1                          | Set2 | Set3 | Set1       | Set2 | Set3 |
| No Compound        | 7916                          | 8475 | 7946 | 98         | 105  | 98   |
| 0                  | 7931                          | 8294 | 8548 | 98         | 102  | 105  |
| 1.0                | 8243                          | 8911 | 8738 | 102        | 110  | 108  |
| 1.5                | 8479                          | 8559 | 8727 | 105        | 106  | 108  |
| 2.0                | 8059                          | 8258 | 8420 | 99         | 102  | 104  |
| 2.5                | 7826                          | 7572 | 7833 | 96         | 93   | 97   |
| 3.0                | 5845                          | 6420 | 6359 | 72         | 79   | 78   |
| 3.5                | 3535                          | 3967 | 3561 | 43         | 48   | 43   |
| 4.0                | 2000                          | 2074 | 1912 | 23         | 24   | 22   |
| 4.5                | 783                           | 857  | 774  | 8          | 9    | 8    |
| 5.0                | 439                           | 448  | 403  | 4          | 4    | 4    |
| Background         | 115                           | 137  | 117  |            |      |      |

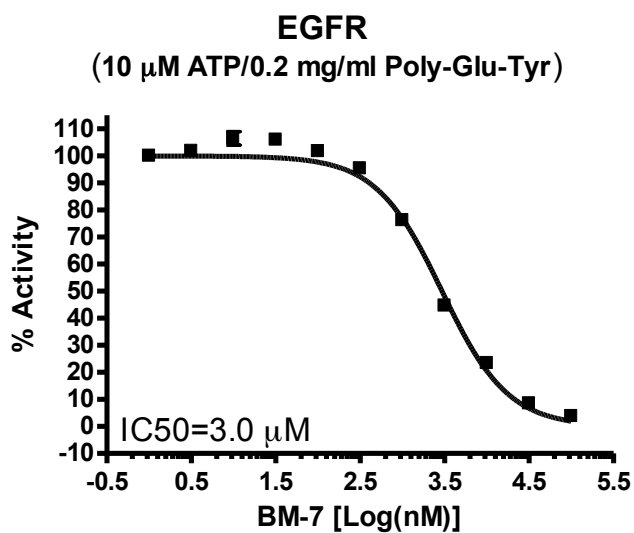



**Table S7: Data for the Effect of BM-19 (compound 7) on EGFR Activity**

| BM-19<br>(Log [nM]) | EGFR Activity<br>Luminescence |      |      | % Activity |      |      |
|---------------------|-------------------------------|------|------|------------|------|------|
|                     | Set1                          | Set2 | Set3 | Set1       | Set2 | Set3 |
| No Compound         | 7606                          | 7242 | 7558 | 102        | 97   | 101  |
| 0                   | 3323                          | 3805 | 4016 | 44         | 50   | 53   |
| 1.0                 | 1415                          | 1335 | 1613 | 18         | 17   | 20   |
| 1.5                 | 1013                          | 1097 | 1223 | 12         | 13   | 15   |
| 2.0                 | 418                           | 467  | 440  | 4          | 5    | 4    |
| 2.5                 | 347                           | 316  | 370  | 3          | 3    | 3    |
| 3.0                 | 199                           | 247  | 272  | 1          | 2    | 2    |
| 3.5                 | 156                           | 163  | 148  | 1          | 1    | 0    |
| 4.0                 | 136                           | 143  | 123  | 0          | 0    | 0    |
| 4.5                 | 186                           | 176  | 177  | 1          | 1    | 1    |
| 5.0                 | 148                           | 135  | 132  | 0          | 0    | 0    |
| Background          | 125                           | 110  | 117  |            |      |      |

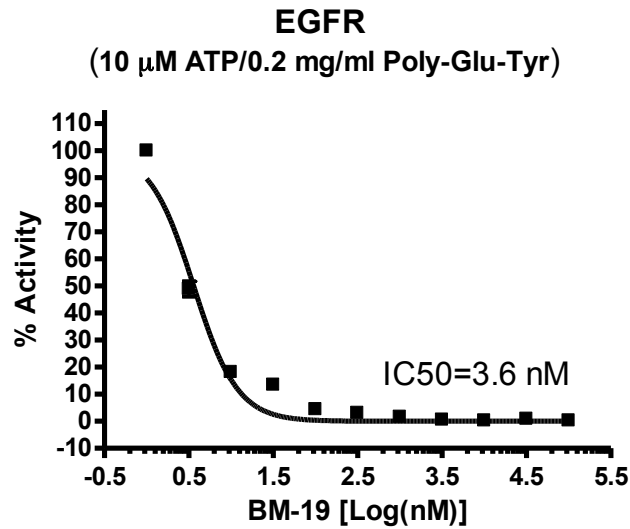

**Table S8: Data for the Effect of AF-36 (compound 8) on EGFR Activity**

| AF-36<br>(Log [nM]) | EGFR Activity<br>Luminescence |       |      | % Activity |      |      |
|---------------------|-------------------------------|-------|------|------------|------|------|
|                     | Set1                          | Set2  | Set3 | Set1       | Set2 | Set3 |
| No Compound         | 9729                          | 10039 | 9851 | 98         | 102  | 100  |
| 0                   | 9567                          | 9812  | 9790 | 97         | 99   | 99   |
| 1.0                 | 9381                          | 10015 | 9043 | 95         | 102  | 91   |
| 1.5                 | 9236                          | 10085 | 8383 | 93         | 102  | 84   |
| 2.0                 | 8064                          | 8296  | 8177 | 80         | 83   | 82   |
| 2.5                 | 5401                          | 5165  | 5502 | 51         | 49   | 53   |
| 3.0                 | 3054                          | 2830  | 3160 | 26         | 23   | 27   |
| 3.5                 | 1728                          | 1521  | 1591 | 12         | 9    | 10   |
| 4.0                 | 1075                          | 1135  | 1002 | 4          | 5    | 4    |
| 4.5                 | 867                           | 946   | 738  | 2          | 3    | 1    |
| 5.0                 | 778                           | 736   | 811  | 1          | 1    | 2    |
| Background          | 702                           | 675   | 623  |            |      |      |

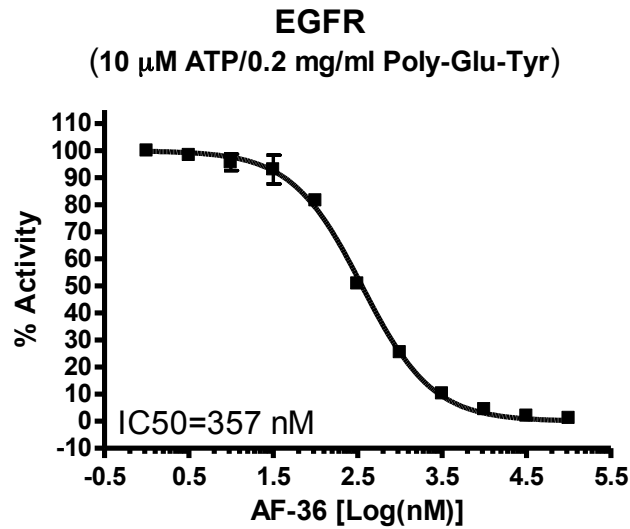

**Table S9: Data for the Effect of BM-26 (compound 9) on Kinase Activity**

| BM-26<br>(Log [nM]) | EGFR Activity<br>Luminescence |      |      | % Activity |      |      |
|---------------------|-------------------------------|------|------|------------|------|------|
|                     | Set1                          | Set2 | Set3 | Set1       | Set2 | Set3 |
| No Compound         | 8642                          | 8755 | 9597 | 96         | 97   | 107  |
| 0                   | 9265                          | 8849 | 9375 | 103        | 98   | 105  |
| 1.0                 | 10035                         | 9759 | 9267 | 112        | 109  | 103  |
| 1.5                 | 10113                         | 9637 | 8565 | 113        | 108  | 95   |
| 2.0                 | 8606                          | 7989 | 7398 | 95         | 88   | 81   |
| 2.5                 | 6831                          | 5932 | 6251 | 74         | 63   | 67   |
| 3.0                 | 3701                          | 3604 | 4223 | 36         | 35   | 43   |
| 3.5                 | 2166                          | 2026 | 2618 | 18         | 16   | 23   |
| 4.0                 | 1356                          | 1259 | 1526 | 8          | 7    | 10   |
| 4.5                 | 911                           | 982  | 883  | 3          | 4    | 3    |
| 5.0                 | 779                           | 791  | 814  | 1          | 1    | 2    |
| Background          | 609                           | 681  | 715  |            |      |      |

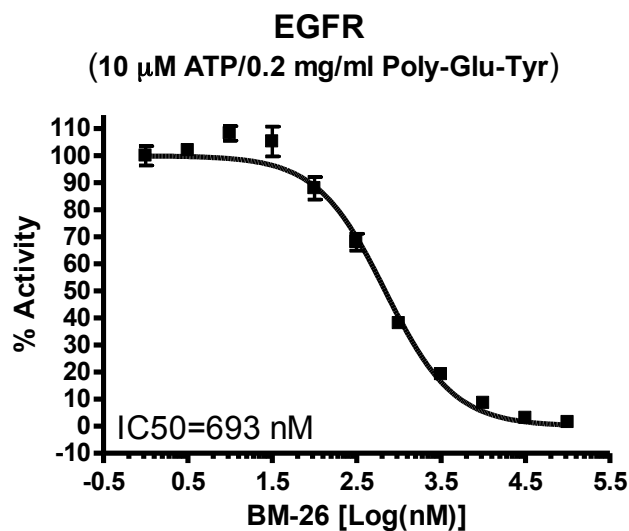

**Table S10: Data for the Effect of BM-22 (compound 10) on Kinase Activity**

| BM-22<br>(Log [nM]) | EGFR Activity<br>Luminescence |      |      | % Activity |      |      |
|---------------------|-------------------------------|------|------|------------|------|------|
|                     | Set1                          | Set2 | Set3 | Set1       | Set2 | Set3 |
| No Compound         | 8406                          | 7924 | 8198 | 103        | 97   | 100  |
| 0                   | 7381                          | 7890 | 8454 | 90         | 96   | 103  |
| 1.0                 | 7929                          | 7395 | 7934 | 97         | 90   | 97   |
| 1.5                 | 6377                          | 6701 | 6538 | 78         | 82   | 80   |
| 2.0                 | 4398                          | 4664 | 4222 | 53         | 56   | 51   |
| 2.5                 | 2560                          | 2486 | 2394 | 30         | 29   | 28   |
| 3.0                 | 1237                          | 1082 | 1109 | 14         | 12   | 12   |
| 3.5                 | 582                           | 548  | 539  | 6          | 5    | 5    |
| 4.0                 | 303                           | 305  | 314  | 2          | 2    | 2    |
| 4.5                 | 244                           | 242  | 203  | 1          | 1    | 1    |
| 5.0                 | 225                           | 217  | 220  | 1          | 1    | 1    |
| Background          | 123                           | 115  | 147  |            |      |      |

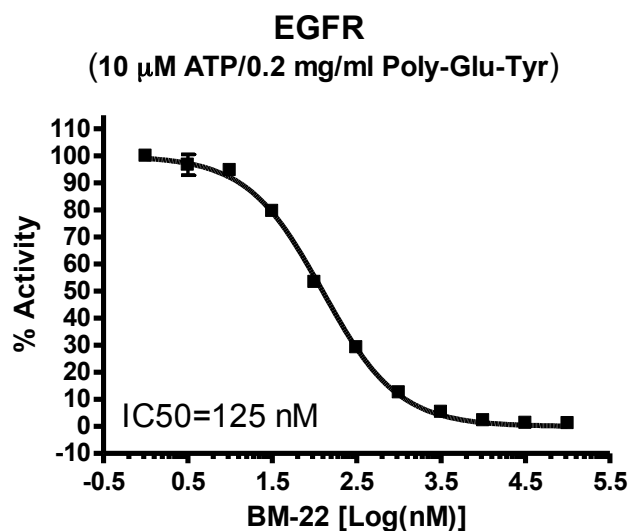

**Table S11: Data for the Effect of BM-31 (compound 11) on Kinase Activity**

| BM-31<br>(Log [nM]) | EGFR Activity<br>Luminescence |      |      | % Activity |      |      |
|---------------------|-------------------------------|------|------|------------|------|------|
|                     | Set1                          | Set2 | Set3 | Set1       | Set2 | Set3 |
| No Compound         | 10193                         | 9755 | 9586 | 104        | 99   | 97   |
| 0                   | 6714                          | 6349 | 6470 | 66         | 62   | 63   |
| 1.0                 | 3992                          | 3767 | 4275 | 36         | 34   | 39   |
| 1.5                 | 2259                          | 2151 | 2492 | 17         | 16   | 20   |
| 2.0                 | 1419                          | 1332 | 1727 | 8          | 7    | 11   |
| 2.5                 | 1227                          | 1057 | 1195 | 6          | 4    | 6    |
| 3.0                 | 965                           | 736  | 905  | 3          | 1    | 2    |
| 3.5                 | 889                           | 688  | 678  | 2          | 0    | 0    |
| 4.0                 | 740                           | 608  | 619  | 1          | 0    | 0    |
| 4.5                 | 728                           | 615  | 643  | 0          | 0    | 0    |
| 5.0                 | 708                           | 708  | 566  | 0          | 0    | 0    |
| Background          | 737                           | 705  | 605  |            |      |      |

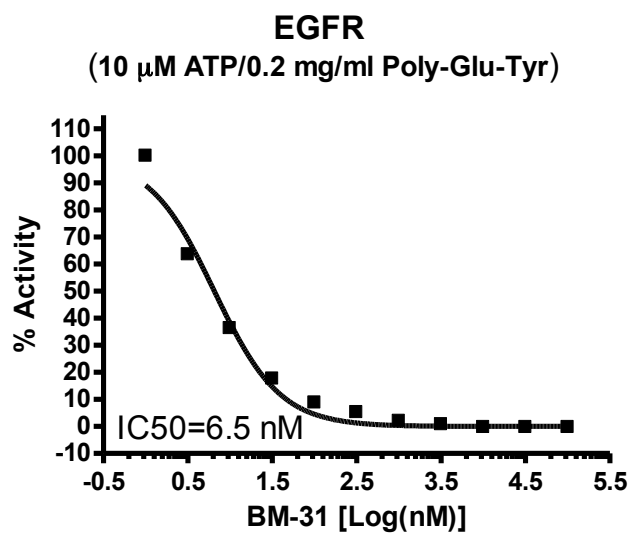

**Table S12: Data for the Effect of BM-25 (compound 12) on Kinase Activity**

| BM-25<br>(Log [nM]) | EGFR Activity<br>Luminescence |      |      | % Activity |      |      |
|---------------------|-------------------------------|------|------|------------|------|------|
|                     | Set1                          | Set2 | Set3 | Set1       | Set2 | Set3 |
| No Compound         | 7404                          | 7610 | 7571 | 98         | 101  | 101  |
| 0                   | 5844                          | 6675 | 5735 | 77         | 88   | 76   |
| 1.0                 | 5246                          | 5682 | 5046 | 69         | 75   | 66   |
| 1.5                 | 2654                          | 3010 | 2535 | 34         | 39   | 33   |
| 2.0                 | 1529                          | 1551 | 1306 | 19         | 19   | 16   |
| 2.5                 | 846                           | 766  | 685  | 10         | 9    | 8    |
| 3.0                 | 520                           | 496  | 462  | 5          | 5    | 5    |
| 3.5                 | 280                           | 784  | 271  | 2          | 9    | 2    |
| 4.0                 | 174                           | 185  | 188  | 1          | 1    | 1    |
| 4.5                 | 147                           | 155  | 153  | 0          | 0    | 0    |
| 5.0                 | 117                           | 138  | 134  | 0          | 0    | 0    |
| Background          | 123                           | 129  | 130  |            |      |      |

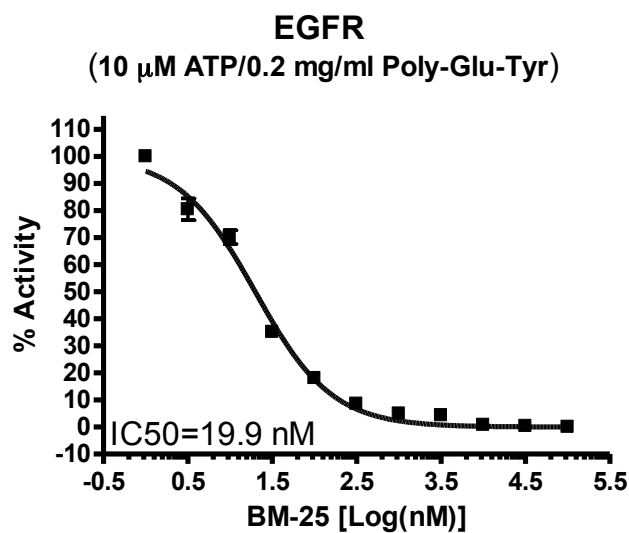

**Table S13: Data for the Effect of BM-34 (compound 13) on Kinase Activity**

| BM-34<br>(Log [nM]) | EGFR Activity<br>Luminescence |       |       | % Activity |      |      |
|---------------------|-------------------------------|-------|-------|------------|------|------|
|                     | Set1                          | Set2  | Set3  | Set1       | Set2 | Set3 |
| No Compound         | 10673                         | 11373 | 10570 | 98         | 105  | 97   |
| 0                   | 10005                         | 10067 | 9924  | 91         | 92   | 91   |
| 1.0                 | 7423                          | 8429  | 10354 | 66         | 76   | 95   |
| 1.5                 | 6162                          | 6962  | 6386  | 54         | 61   | 56   |
| 2.0                 | 3683                          | 3759  | 3931  | 29         | 30   | 32   |
| 2.5                 | 2458                          | 2668  | 2250  | 17         | 19   | 15   |
| 3.0                 | 1558                          | 1505  | 1377  | 8          | 8    | 6    |
| 3.5                 | 991                           | 1087  | 1035  | 3          | 4    | 3    |
| 4.0                 | 749                           | 857   | 839   | 0          | 1    | 1    |
| 4.5                 | 675                           | 866   | 766   | 0          | 1    | 0    |
| 5.0                 | 714                           | 714   | 801   | 0          | 0    | 1    |
| Background          | 691                           | 681   | 788   |            |      |      |

**EGFR**  
(10  $\mu$ M ATP/0.2 mg/ml Poly-Glu-Tyr)

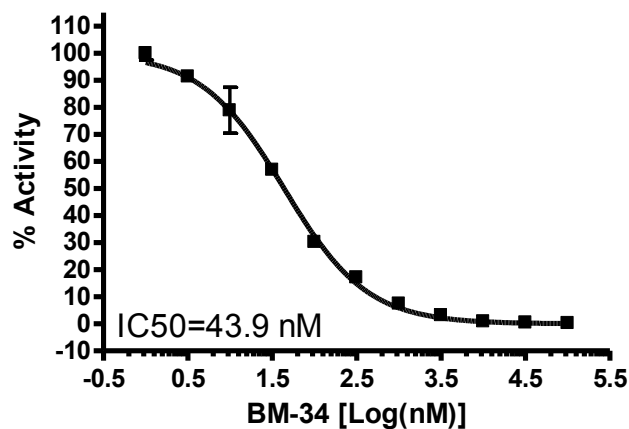

**Table S14: Data for the Effect of BM-17 (compound 14) on Kinase Activity**

| BM-17<br>(Log [nM]) | EGFR Activity<br>Luminescence |      |      | % Activity |      |      |
|---------------------|-------------------------------|------|------|------------|------|------|
|                     | Set1                          | Set2 | Set3 | Set1       | Set2 | Set3 |
| No Compound         | 8769                          | 8304 | 7968 | 105        | 99   | 95   |
| 0                   | 8375                          | 7949 | 7887 | 100        | 95   | 94   |
| 1.0                 | 8774                          | 7492 | 8005 | 105        | 90   | 96   |
| 1.5                 | 9013                          | 6975 | 7766 | 108        | 83   | 93   |
| 2.0                 | 7470                          | 6322 | 7043 | 89         | 75   | 84   |
| 2.5                 | 5272                          | 4502 | 4827 | 62         | 53   | 57   |
| 3.0                 | 3081                          | 2364 | 2846 | 36         | 27   | 33   |
| 3.5                 | 1463                          | 1323 | 1426 | 16         | 14   | 16   |
| 4.0                 | 830                           | 670  | 686  | 8          | 6    | 7    |
| 4.5                 | 451                           | 373  | 389  | 4          | 3    | 3    |
| 5.0                 | 550                           | 473  | 489  | 5          | 4    | 4    |
| Background          | 170                           | 143  | 131  |            |      |      |

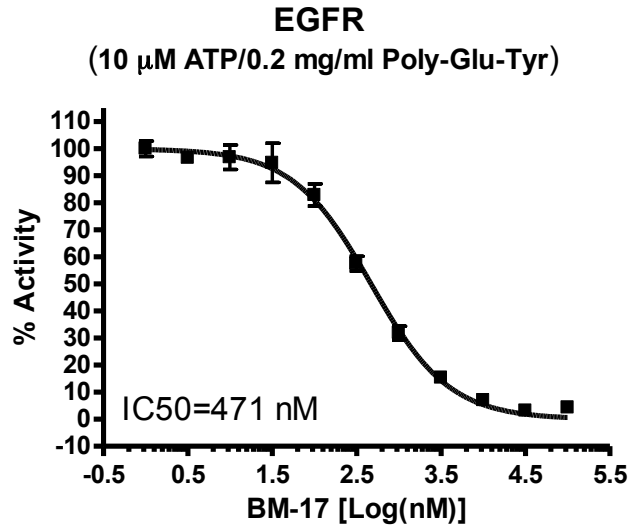



**Table S15: Data for the Effect of BM-24 (compound 15) on Kinase Activity**

| BM-24<br>(Log [nM]) | EGFR Activity<br>Luminescence |       |       | % Activity |      |      |
|---------------------|-------------------------------|-------|-------|------------|------|------|
|                     | Set1                          | Set2  | Set3  | Set1       | Set2 | Set3 |
| No Compound         | 8471                          | 9578  | 9891  | 90         | 103  | 107  |
| 0                   | 9075                          | 9098  | 11146 | 97         | 98   | 121  |
| 1.0                 | 10080                         | 9442  | 11720 | 109        | 101  | 128  |
| 1.5                 | 10467                         | 10011 | 11258 | 113        | 108  | 122  |
| 2.0                 | 10268                         | 9446  | 9212  | 111        | 102  | 99   |
| 2.5                 | 7351                          | 7756  | 7961  | 77         | 82   | 84   |
| 3.0                 | 5432                          | 5760  | 5158  | 55         | 59   | 52   |
| 3.5                 | 2430                          | 2768  | 2653  | 20         | 24   | 23   |
| 4.0                 | 1672                          | 1714  | 1547  | 12         | 12   | 10   |
| 4.5                 | 1014                          | 1114  | 1007  | 4          | 5    | 4    |
| 5.0                 | 965                           | 880   | 926   | 4          | 3    | 3    |
| Background          | 655                           | 684   | 647   |            |      |      |

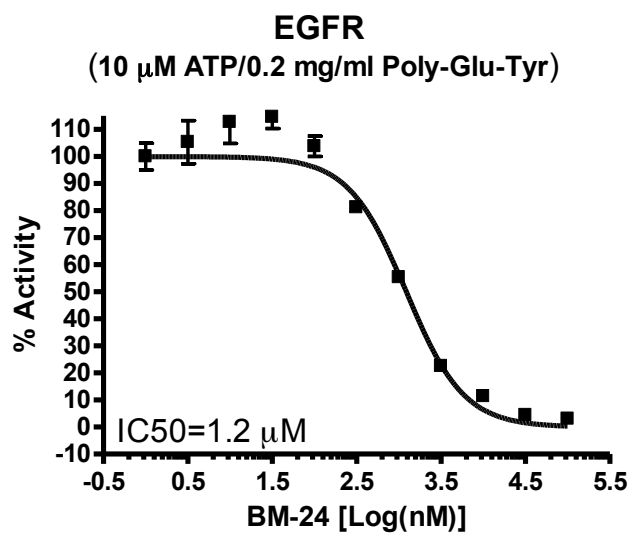

**Table S16: Data for the Effect of RS-48 (compound 16) on Kinase Activity**

| RS-48<br>(Log [nM]) | EGFR Activity<br>Luminescence |       |       | % Activity |      |      |
|---------------------|-------------------------------|-------|-------|------------|------|------|
|                     | Set1                          | Set2  | Set3  | Set1       | Set2 | Set3 |
| No Compound         | 10446                         | 10163 | 10100 | 102        | 99   | 99   |
| 0                   | 10214                         | 10492 | 10039 | 100        | 103  | 98   |
| 1.0                 | 11377                         | 10864 | 11095 | 111        | 106  | 109  |
| 1.5                 | 11017                         | 11768 | 10619 | 108        | 115  | 104  |
| 2.0                 | 10837                         | 10740 | 10951 | 106        | 105  | 107  |
| 2.5                 | 10956                         | 11243 | 11620 | 107        | 110  | 114  |
| 3.0                 | 10698                         | 10239 | 11292 | 105        | 100  | 111  |
| 3.5                 | 8965                          | 9550  | 9871  | 87         | 93   | 96   |
| 4.0                 | 7535                          | 7482  | 7669  | 73         | 73   | 74   |
| 4.5                 | 8344                          | 8648  | 9574  | 81         | 84   | 93   |
| 5.0                 | 8127                          | 8719  | 9104  | 79         | 85   | 89   |
| Background          | 185                           | 179   | 212   |            |      |      |

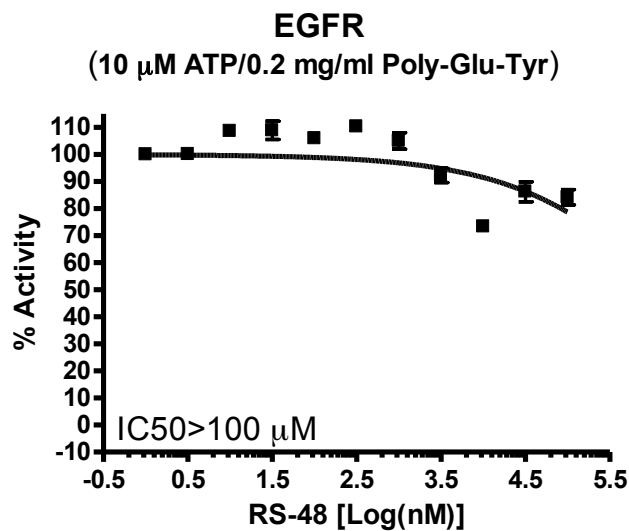

**Table S17: Data for the Effect of BM-23 (compound 17) on Kinase Activity**

| BM-23<br>(Log [nM]) | EGFR Activity<br>Luminescence |      |      | % Activity |      |      |
|---------------------|-------------------------------|------|------|------------|------|------|
|                     | Set1                          | Set2 | Set3 | Set1       | Set2 | Set3 |
| No Compound         | 6679                          | 7527 | 7688 | 91         | 103  | 105  |
| 0                   | 6787                          | 7360 | 7260 | 93         | 101  | 99   |
| 1.0                 | 6567                          | 6682 | 7107 | 90         | 91   | 97   |
| 1.5                 | 5290                          | 5651 | 6106 | 72         | 77   | 83   |
| 2.0                 | 3648                          | 3745 | 4072 | 49         | 51   | 55   |
| 2.5                 | 1848                          | 1747 | 2214 | 24         | 23   | 29   |
| 3.0                 | 907                           | 810  | 983  | 11         | 10   | 12   |
| 3.5                 | 477                           | 469  | 511  | 5          | 5    | 5    |
| 4.0                 | 406                           | 406  | 455  | 4          | 4    | 5    |
| 4.5                 | 463                           | 472  | 470  | 5          | 5    | 5    |
| 5.0                 | 431                           | 423  | 429  | 4          | 4    | 4    |
| Background          | 119                           | 123  | 108  |            |      |      |

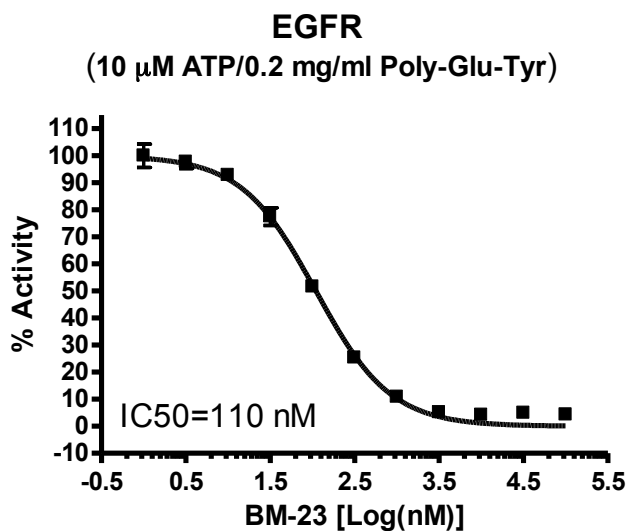

**Table S18: Data for the Effect of SZ-34 (compound 18) on Kinase Activity**

| SZ-34<br>(Log [nM]) | EGFR Activity<br>Luminescence |      |       | % Activity |      |      |
|---------------------|-------------------------------|------|-------|------------|------|------|
|                     | Set1                          | Set2 | Set3  | Set1       | Set2 | Set3 |
| No Compound         | 9812                          | 9614 | 10158 | 99         | 97   | 103  |
| 0                   | 9452                          | 9109 | 9358  | 96         | 92   | 95   |
| 1.0                 | 8721                          | 8170 | 8718  | 88         | 83   | 88   |
| 1.5                 | 6593                          | 6142 | 6443  | 66         | 62   | 65   |
| 2.0                 | 4209                          | 3862 | 4314  | 42         | 38   | 43   |
| 2.5                 | 1767                          | 1747 | 1751  | 16         | 16   | 16   |
| 3.0                 | 969                           | 945  | 1085  | 8          | 8    | 9    |
| 3.5                 | 461                           | 446  | 482   | 3          | 3    | 3    |
| 4.0                 | 378                           | 363  | 346   | 2          | 2    | 2    |
| 4.5                 | 346                           | 350  | 372   | 2          | 2    | 2    |
| 5.0                 | 341                           | 487  | 337   | 2          | 3    | 2    |
| Background          | 189                           | 190  | 183   |            |      |      |

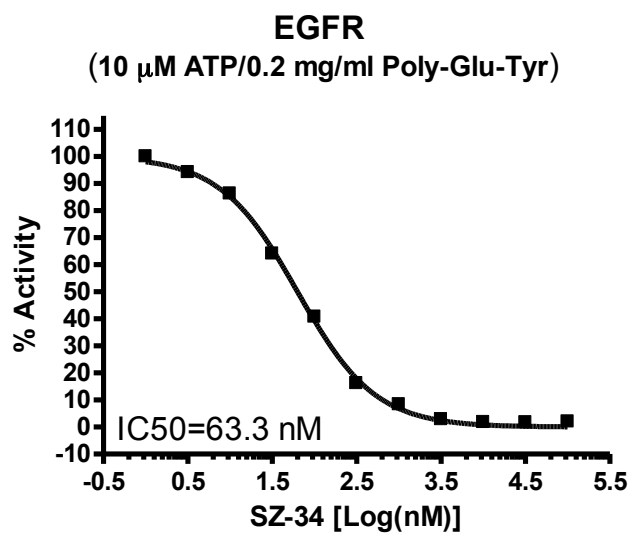

**Table S19: Data for the Effect of Staurosporine on EGFR Activity**

| Staurosporine<br>(Log [nM]) | EGFR Activity<br>Luminescence |      |      | % Activity |      |      |
|-----------------------------|-------------------------------|------|------|------------|------|------|
|                             | Set1                          | Set2 | Set3 | Set1       | Set2 | Set3 |
| No Compound                 | 8140                          | 8688 | 8620 | 96         | 102  | 102  |
| -1.0                        | 7563                          | 7968 | 8284 | 89         | 94   | 98   |
| -0.5                        | 8086                          | 8558 | 8505 | 95         | 101  | 100  |
| 0                           | 7867                          | 8330 | 8179 | 93         | 98   | 96   |
| 1.0                         | 6484                          | 6960 | 7653 | 76         | 82   | 90   |
| 1.5                         | 4694                          | 5232 | 5158 | 54         | 61   | 60   |
| 2.0                         | 2353                          | 2450 | 2652 | 26         | 27   | 30   |
| 2.5                         | 1134                          | 1036 | 1137 | 12         | 10   | 12   |
| 3.0                         | 573                           | 642  | 620  | 5          | 6    | 5    |
| 3.5                         | 329                           | 345  | 366  | 2          | 2    | 2    |
| 4.0                         | 249                           | 247  | 243  | 1          | 1    | 1    |
| Background                  | 136                           | 149  | 236  |            |      |      |

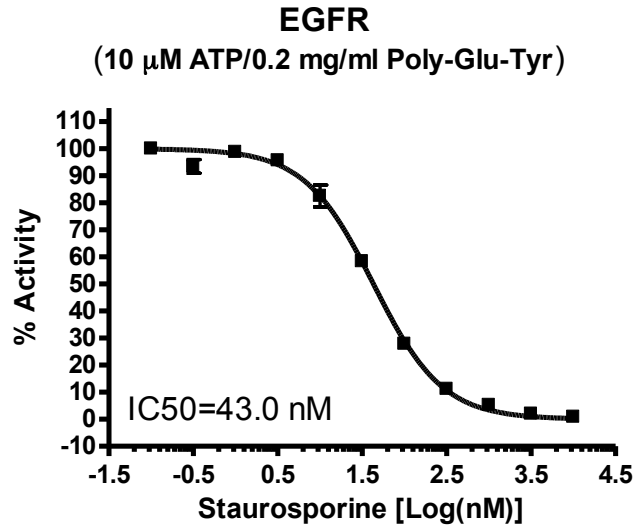

**Table S20: Data for the Effect of SK-34 (compound 1) on AURKA Activity**

| SK-34<br>(Log [nM]) | AuroraA Activity<br>Luminescence |      |      | % Activity |      |      |
|---------------------|----------------------------------|------|------|------------|------|------|
|                     | Set1                             | Set2 | Set3 | Set1       | Set2 | Set3 |
| No Compound         | 5578                             | 5602 | 5577 | 100        | 100  | 100  |
| 0                   | 5068                             | 5094 | 5136 | 91         | 91   | 92   |
| 1.0                 | 4849                             | 5043 | 5114 | 87         | 90   | 91   |
| 1.5                 | 5217                             | 5477 | 5611 | 93         | 98   | 100  |
| 2.0                 | 5357                             | 5398 | 5607 | 96         | 97   | 100  |
| 2.5                 | 5516                             | 5724 | 5806 | 99         | 103  | 104  |
| 3.0                 | 4800                             | 5043 | 5211 | 86         | 90   | 93   |
| 3.5                 | 3538                             | 3942 | 3940 | 63         | 70   | 70   |
| 4.0                 | 1654                             | 1787 | 1871 | 28         | 31   | 32   |
| 4.5                 | 717                              | 773  | 796  | 11         | 12   | 13   |
| 5.0                 | 347                              | 395  | 394  | 5          | 5    | 5    |
| Background          | 89                               | 94   | 104  |            |      |      |

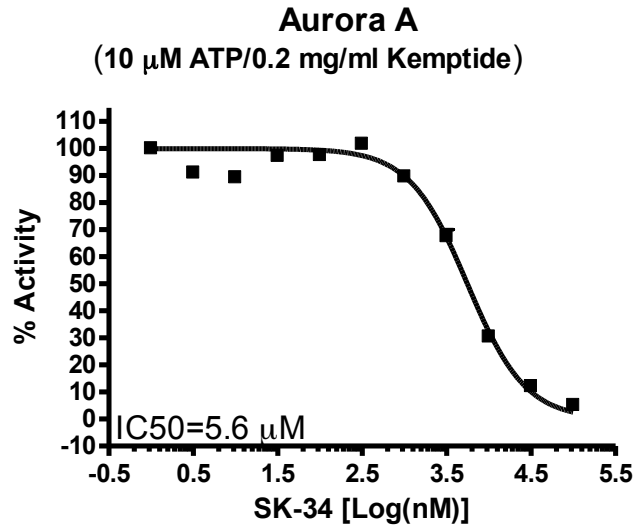

**Table S21: Data for the Effect of SK-18 (compound 2) on AURKA Activity**

| SK-18<br>(Log [nM]) | AuroraA Activity<br>Luminescence |      |      | % Activity |      |      |
|---------------------|----------------------------------|------|------|------------|------|------|
|                     | Set1                             | Set2 | Set3 | Set1       | Set2 | Set3 |
| No Compound         | 5264                             | 5042 | 5127 | 102        | 98   | 100  |
| 0                   | 5510                             | 4820 | 4860 | 107        | 94   | 94   |
| 1.0                 | 5603                             | 4969 | 4952 | 109        | 97   | 96   |
| 1.5                 | 5578                             | 4922 | 5203 | 109        | 96   | 101  |
| 2.0                 | 5270                             | 5013 | 5387 | 102        | 97   | 105  |
| 2.5                 | 4854                             | 4562 | 4905 | 94         | 88   | 95   |
| 3.0                 | 3650                             | 3428 | 3600 | 70         | 66   | 69   |
| 3.5                 | 1886                             | 1812 | 1820 | 35         | 34   | 34   |
| 4.0                 | 901                              | 826  | 831  | 16         | 14   | 14   |
| 4.5                 | 393                              | 383  | 384  | 6          | 5    | 5    |
| 5.0                 | 366                              | 368  | 341  | 5          | 5    | 5    |
| Background          | 131                              | 94   | 96   |            |      |      |

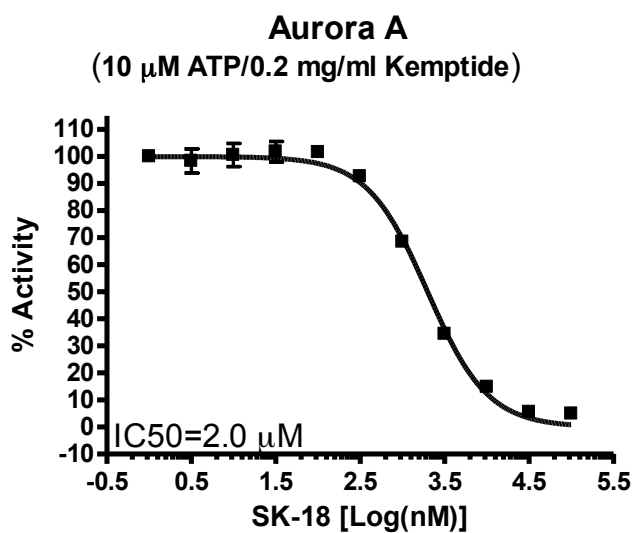

**Table S22: Data for the Effect of SK-17 (compound 3) on AURKA Activity**

| SK-17<br>(Log [nM]) | AuroraA Activity<br>Luminescence |      |      | % Activity |      |      |
|---------------------|----------------------------------|------|------|------------|------|------|
|                     | Set1                             | Set2 | Set3 | Set1       | Set2 | Set3 |
| No Compound         | 3875                             | 3936 | 3969 | 99         | 100  | 101  |
| 0                   | 3725                             | 3643 | 3908 | 95         | 93   | 100  |
| 1.0                 | 3884                             | 3792 | 3972 | 99         | 96   | 101  |
| 1.5                 | 3892                             | 3705 | 4112 | 99         | 94   | 105  |
| 2.0                 | 4127                             | 4093 | 4204 | 105        | 104  | 107  |
| 2.5                 | 4077                             | 4114 | 4057 | 104        | 105  | 103  |
| 3.0                 | 3075                             | 2967 | 3034 | 78         | 75   | 77   |
| 3.5                 | 2130                             | 2260 | 2097 | 53         | 57   | 52   |
| 4.0                 | 761                              | 714  | 708  | 17         | 16   | 16   |
| 4.5                 | 351                              | 327  | 353  | 7          | 6    | 7    |
| 5.0                 | 322                              | 280  | 292  | 6          | 5    | 5    |
| Background          | 93                               | 93   | 83   |            |      |      |

**Aurora A**  
(10  $\mu$ M ATP/0.2 mg/ml Poly-Glu-Tyr)

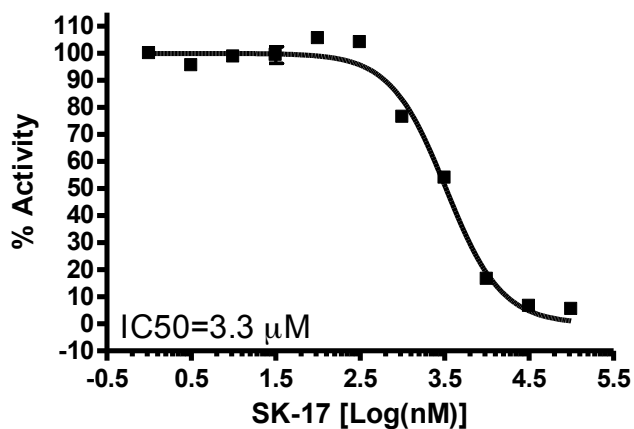



**Table S23: Data for the Effect of TM-9 (compound 4) on AURKA Activity**

| TM-9<br>(Log [nM]) | AuroraA Activity<br>Luminescence |      |      | % Activity |      |      |
|--------------------|----------------------------------|------|------|------------|------|------|
|                    | Set1                             | Set2 | Set3 | Set1       | Set2 | Set3 |
| No Compound        | 4310                             | 4797 | 4341 | 96         | 107  | 97   |
| 0                  | 4387                             | 4548 | 4329 | 98         | 101  | 97   |
| 1.0                | 4454                             | 4380 | 4502 | 99         | 98   | 100  |
| 1.5                | 4668                             | 4832 | 4550 | 104        | 108  | 102  |
| 2.0                | 4697                             | 4783 | 4659 | 105        | 107  | 104  |
| 2.5                | 4622                             | 4432 | 4506 | 103        | 99   | 101  |
| 3.0                | 3949                             | 4169 | 3875 | 88         | 93   | 86   |
| 3.5                | 2972                             | 3099 | 3064 | 66         | 69   | 68   |
| 4.0                | 1163                             | 1292 | 1202 | 25         | 28   | 25   |
| 4.5                | 580                              | 563  | 545  | 11         | 11   | 11   |
| 5.0                | 466                              | 501  | 462  | 9          | 10   | 9    |
| Background         | 93                               | 76   | 76   |            |      |      |

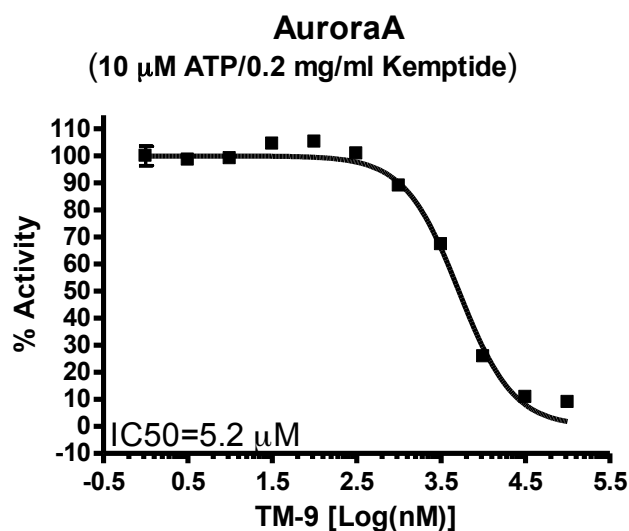

**Table S24: Data for the Effect of SK-32 (compound 5) on AURKA Activity**

| SK-32<br>(Log [nM]) | AuroraA Activity<br>Luminescence |      |      | % Activity |      |      |
|---------------------|----------------------------------|------|------|------------|------|------|
|                     | Set1                             | Set2 | Set3 | Set1       | Set2 | Set3 |
| No Compound         | 4416                             | 4531 | 4800 | 96         | 99   | 105  |
| 0                   | 4357                             | 4466 | 4728 | 95         | 97   | 103  |
| 1.0                 | 4756                             | 4350 | 4445 | 104        | 95   | 97   |
| 1.5                 | 4514                             | 4649 | 4672 | 98         | 101  | 102  |
| 2.0                 | 4780                             | 4903 | 4795 | 104        | 107  | 105  |
| 2.5                 | 4736                             | 4921 | 4847 | 103        | 108  | 106  |
| 3.0                 | 4166                             | 4752 | 4185 | 91         | 104  | 91   |
| 3.5                 | 2575                             | 2402 | 2681 | 55         | 51   | 58   |
| 4.0                 | 808                              | 1023 | 942  | 16         | 21   | 19   |
| 4.5                 | 580                              | 623  | 598  | 11         | 12   | 11   |
| 5.0                 | 584                              | 612  | 665  | 11         | 12   | 13   |
| Background          | 92                               | 97   | 81   |            |      |      |

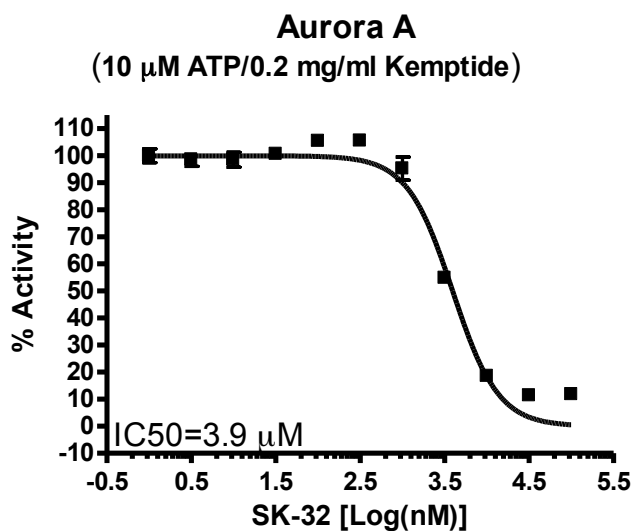

**Table S25: Data for the Effect of BM-7 (compound 6) on AURKA Activity**

| BM-7<br>(Log [nM]) | AuroraA<br>Luminescence |      |      | % Activity |      |      |
|--------------------|-------------------------|------|------|------------|------|------|
|                    | Set1                    | Set2 | Set3 | Set1       | Set2 | Set3 |
| No Compound        | 4334                    | 4284 | 4248 | 101        | 100  | 99   |
| 0                  | 4436                    | 4028 | 3776 | 104        | 94   | 88   |
| 1.0                | 4065                    | 3841 | 3893 | 95         | 89   | 91   |
| 1.5                | 4759                    | 4272 | 4706 | 111        | 100  | 110  |
| 2.0                | 4308                    | 4074 | 4129 | 100        | 95   | 96   |
| 2.5                | 4623                    | 4268 | 4520 | 108        | 100  | 106  |
| 3.0                | 3791                    | 3909 | 3639 | 88         | 91   | 84   |
| 3.5                | 3723                    | 3454 | 3267 | 86         | 80   | 76   |
| 4.0                | 1386                    | 1497 | 1254 | 30         | 33   | 27   |
| 4.5                | 708                     | 701  | 640  | 14         | 14   | 13   |
| 5.0                | 433                     | 348  | 282  | 8          | 6    | 4    |
| Background         | 176                     | 88   | 76   |            |      |      |

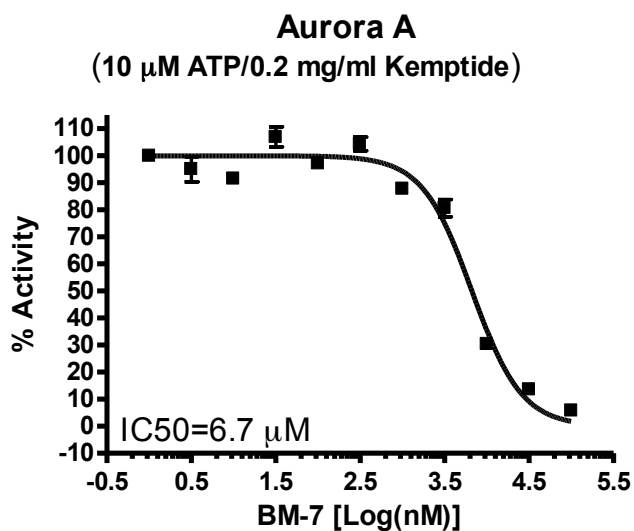

**Table S26: Data for the Effect of BM-19 (compound 7) on AURKA Activity**

| BM-19<br>(Log [nM]) | AuroraA Activity<br>Luminescence |      |      | % Activity |      |      |
|---------------------|----------------------------------|------|------|------------|------|------|
|                     | Set1                             | Set2 | Set3 | Set1       | Set2 | Set3 |
| No Compound         | 5013                             | 4935 | 5330 | 98         | 97   | 105  |
| 0                   | 4855                             | 5181 | 4855 | 95         | 102  | 95   |
| 1.0                 | 5100                             | 5260 | 5047 | 100        | 103  | 99   |
| 1.5                 | 5090                             | 5239 | 5227 | 100        | 103  | 103  |
| 2.0                 | 5094                             | 5374 | 5354 | 100        | 106  | 105  |
| 2.5                 | 4839                             | 4931 | 4845 | 95         | 97   | 95   |
| 3.0                 | 4823                             | 5237 | 4747 | 95         | 103  | 93   |
| 3.5                 | 2097                             | 2110 | 1950 | 40         | 40   | 37   |
| 4.0                 | 891                              | 901  | 837  | 16         | 16   | 15   |
| 4.5                 | 1656                             | 1607 | 1615 | 31         | 30   | 30   |
| 5.0                 | 934                              | 854  | 899  | 17         | 15   | 16   |
| Background          | 124                              | 98   | 100  |            |      |      |

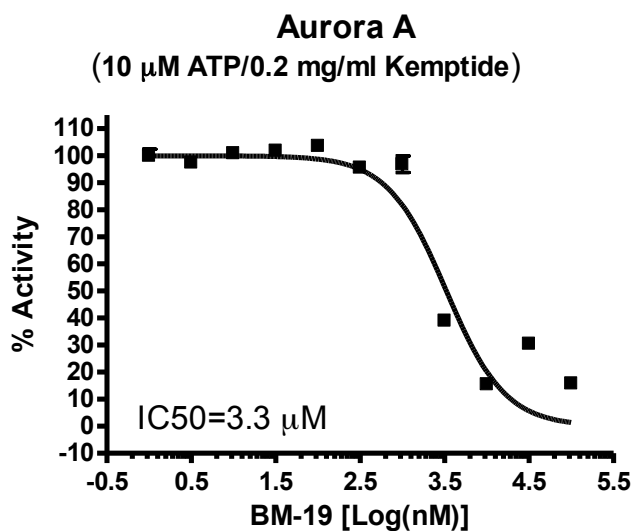

**Table S27: Data for the Effect of AF-36 (compound 8) on AURKA Activity**

| AF-36<br>(Log [nM]) | Aurora A<br>Luminescence |      |      | % Activity |      |      |
|---------------------|--------------------------|------|------|------------|------|------|
|                     | Set1                     | Set2 | Set3 | Set1       | Set2 | Set3 |
| No Compound         | 3685                     | 4270 | 3915 | 93         | 108  | 99   |
| 0                   | 4065                     | 4229 | 3922 | 103        | 107  | 99   |
| 1.0                 | 4346                     | 3983 | 4371 | 110        | 101  | 111  |
| 1.5                 | 4290                     | 4254 | 4144 | 109        | 108  | 105  |
| 2.0                 | 4297                     | 4292 | 4296 | 109        | 109  | 109  |
| 2.5                 | 3823                     | 3977 | 4464 | 96         | 101  | 113  |
| 3.0                 | 3343                     | 3214 | 3640 | 84         | 80   | 92   |
| 3.5                 | 2232                     | 2308 | 2415 | 55         | 57   | 59   |
| 4.0                 | 1294                     | 1236 | 1256 | 30         | 28   | 29   |
| 4.5                 | 556                      | 576  | 578  | 11         | 11   | 11   |
| 5.0                 | 464                      | 429  | 443  | 8          | 7    | 8    |
| Background          | 150                      | 143  | 163  |            |      |      |

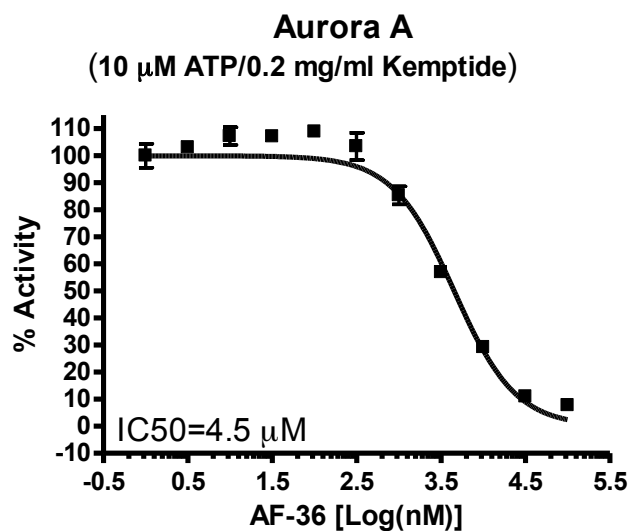

**Table S28: Data for the Effect of BM-26 (compound 9) on Kinase Activity**

| BM-26<br>(Log [nM]) | Aurora A<br>Luminescence |      |      | % Activity |      |      |
|---------------------|--------------------------|------|------|------------|------|------|
|                     | Set1                     | Set2 | Set3 | Set1       | Set2 | Set3 |
| No Compound         | 3868                     | 4131 | 3910 | 97         | 104  | 98   |
| 0                   | 3999                     | 4099 | 4157 | 101        | 103  | 105  |
| 1.0                 | 4501                     | 4095 | 4228 | 114        | 103  | 107  |
| 1.5                 | 4381                     | 4093 | 4325 | 111        | 103  | 109  |
| 2.0                 | 4050                     | 4237 | 4501 | 102        | 107  | 114  |
| 2.5                 | 3935                     | 4051 | 4369 | 99         | 102  | 110  |
| 3.0                 | 3469                     | 3595 | 3616 | 87         | 90   | 91   |
| 3.5                 | 2541                     | 2681 | 2490 | 63         | 66   | 61   |
| 4.0                 | 1353                     | 1268 | 1299 | 32         | 29   | 30   |
| 4.5                 | 747                      | 712  | 655  | 16         | 15   | 13   |
| 5.0                 | 494                      | 478  | 486  | 9          | 9    | 9    |
| Background          | 139                      | 141  | 135  |            |      |      |

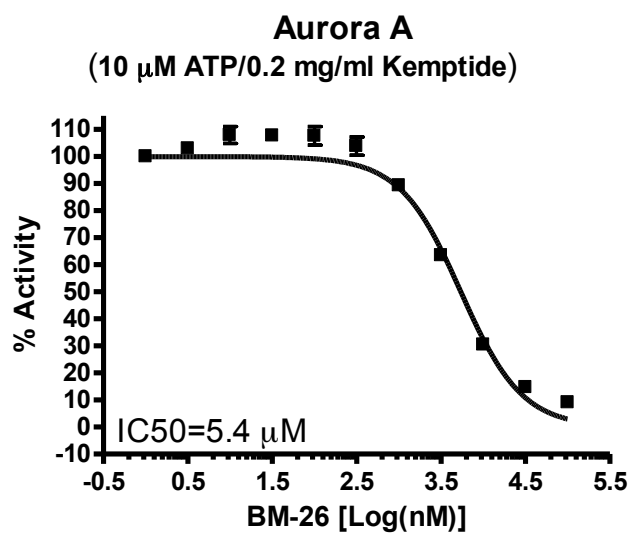

**Table S29: Data for the Effect of BM-22 (compound 10) on Kinase Activity**

| BM-22<br>(Log [nM]) | AuroraA Activity<br>Luminescence |      |      | % Activity |      |      |
|---------------------|----------------------------------|------|------|------------|------|------|
|                     | Set1                             | Set2 | Set3 | Set1       | Set2 | Set3 |
| No Compound         | 4934                             | 4986 | 4984 | 99         | 100  | 100  |
| 0                   | 4857                             | 4318 | 4783 | 98         | 87   | 96   |
| 1.0                 | 4805                             | 4689 | 4691 | 97         | 94   | 94   |
| 1.5                 | 4944                             | 4709 | 4733 | 100        | 95   | 95   |
| 2.0                 | 5056                             | 4805 | 5035 | 102        | 97   | 101  |
| 2.5                 | 4952                             | 4638 | 4862 | 100        | 93   | 98   |
| 3.0                 | 4114                             | 4141 | 4097 | 82         | 83   | 82   |
| 3.5                 | 3037                             | 2771 | 2702 | 60         | 55   | 53   |
| 4.0                 | 1093                             | 1027 | 1090 | 20         | 19   | 20   |
| 4.5                 | 521                              | 524  | 548  | 9          | 9    | 9    |
| 5.0                 | 577                              | 587  | 547  | 10         | 10   | 9    |
| Background          | 98                               | 97   | 102  |            |      |      |

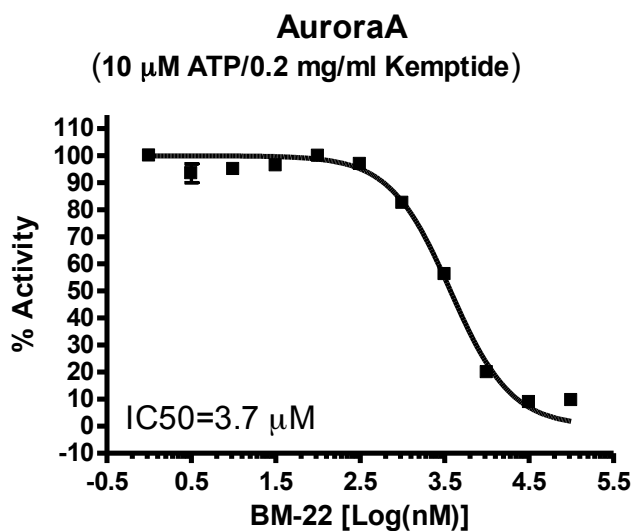

**Table S30: Data for the Effect of BM-31 (compound 11) on Kinase Activity**

| BM-31<br>(Log [nM]) | Aurora A<br>Luminescence |      |      | % Activity |      |      |
|---------------------|--------------------------|------|------|------------|------|------|
|                     | Set1                     | Set2 | Set3 | Set1       | Set2 | Set3 |
| No Compound         | 4407                     | 4193 | 3800 | 107        | 102  | 92   |
| 0                   | 4081                     | 4120 | 3719 | 99         | 100  | 90   |
| 1.0                 | 4475                     | 3951 | 4167 | 109        | 95   | 101  |
| 1.5                 | 4228                     | 4442 | 3961 | 102        | 108  | 96   |
| 2.0                 | 3908                     | 4279 | 4413 | 94         | 104  | 107  |
| 2.5                 | 3951                     | 4046 | 4079 | 95         | 98   | 99   |
| 3.0                 | 3323                     | 3521 | 3489 | 80         | 85   | 84   |
| 3.5                 | 1838                     | 2057 | 2108 | 42         | 48   | 49   |
| 4.0                 | 925                      | 1013 | 901  | 19         | 22   | 19   |
| 4.5                 | 467                      | 508  | 456  | 8          | 9    | 8    |
| 5.0                 | 353                      | 298  | 289  | 5          | 4    | 3    |
| Background          | 150                      | 163  | 157  |            |      |      |

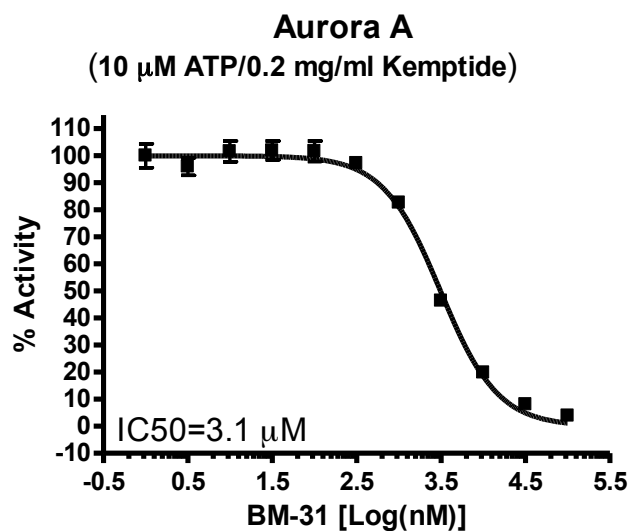



**Table S31: Data for the Effect of BM-25 (compound 12) on Kinase Activity**

| BM-25<br>(Log [nM]) | AuroraA Activity<br>Luminescence |      |      | % Activity |      |      |
|---------------------|----------------------------------|------|------|------------|------|------|
|                     | Set1                             | Set2 | Set3 | Set1       | Set2 | Set3 |
| No Compound         | 4617                             | 4910 | 4949 | 96         | 102  | 103  |
| 0                   | 4881                             | 5079 | 4586 | 101        | 105  | 95   |
| 1.0                 | 4843                             | 4906 | 4688 | 100        | 102  | 97   |
| 1.5                 | 4697                             | 4844 | 4665 | 97         | 100  | 97   |
| 2.0                 | 4638                             | 4895 | 5042 | 96         | 101  | 105  |
| 2.5                 | 4318                             | 4590 | 4604 | 89         | 95   | 95   |
| 3.0                 | 4307                             | 4382 | 4425 | 89         | 91   | 92   |
| 3.5                 | 2388                             | 2451 | 2623 | 48         | 50   | 53   |
| 4.0                 | 926                              | 902  | 904  | 17         | 17   | 17   |
| 4.5                 | 453                              | 492  | 477  | 7          | 8    | 8    |
| 5.0                 | 272                              | 277  | 263  | 4          | 4    | 3    |
| Background          | 115                              | 99   | 85   |            |      |      |

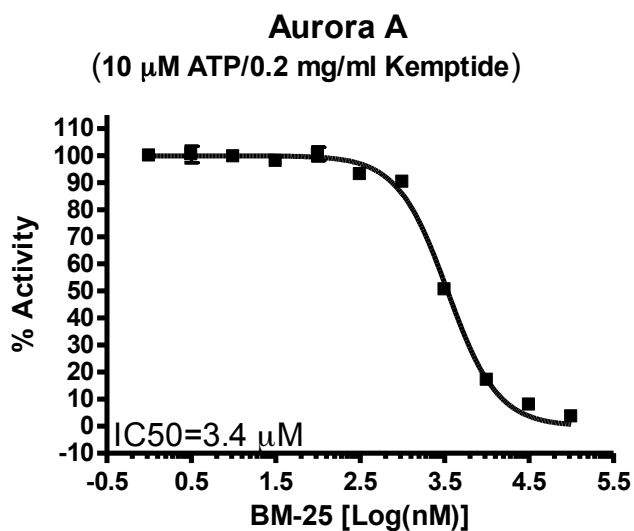

**Table S32: Data for the Effect of BM-34 (compound 13) on Kinase Activity**

| BM-34<br>(Log [nM]) | Aurora A<br>Luminescence |      |      | % Activity |      |      |
|---------------------|--------------------------|------|------|------------|------|------|
|                     | Set1                     | Set2 | Set3 | Set1       | Set2 | Set3 |
| No Compound         | 4440                     | 4084 | 4139 | 105        | 97   | 98   |
| 0                   | 3989                     | 4279 | 4060 | 94         | 101  | 96   |
| 1.0                 | 4333                     | 4252 | 4457 | 103        | 101  | 106  |
| 1.5                 | 4506                     | 4747 | 4983 | 107        | 113  | 119  |
| 2.0                 | 4631                     | 4550 | 4758 | 110        | 108  | 113  |
| 2.5                 | 4535                     | 4530 | 4726 | 108        | 108  | 112  |
| 3.0                 | 3994                     | 4240 | 3965 | 94         | 100  | 94   |
| 3.5                 | 3132                     | 2699 | 3103 | 73         | 63   | 72   |
| 4.0                 | 1467                     | 1201 | 1297 | 32         | 26   | 28   |
| 4.5                 | 697                      | 568  | 606  | 13         | 10   | 11   |
| 5.0                 | 732                      | 618  | 691  | 14         | 11   | 13   |
| Background          | 157                      | 164  | 153  |            |      |      |

**Aurora A**  
(10  $\mu$ M ATP/0.2 mg/ml Kemptide)

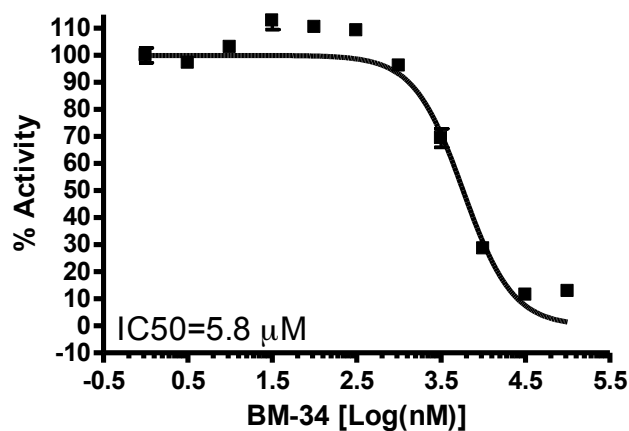

**Table S33: Data for the Effect of BM-17 (compound 14) on Kinase Activity**

| BM-17<br>(Log [nM]) | AuroraA Activity<br>Luminescence |      |      | % Activity |      |      |
|---------------------|----------------------------------|------|------|------------|------|------|
|                     | Set1                             | Set2 | Set3 | Set1       | Set2 | Set3 |
| No Compound         | 4898                             | 4803 | 4768 | 102        | 100  | 99   |
| 0                   | 4682                             | 4436 | 4551 | 97         | 92   | 94   |
| 1.0                 | 4935                             | 4693 | 4706 | 102        | 97   | 98   |
| 1.5                 | 5329                             | 4628 | 4728 | 111        | 96   | 98   |
| 2.0                 | 4963                             | 4705 | 4928 | 103        | 98   | 102  |
| 2.5                 | 4869                             | 5083 | 4873 | 101        | 106  | 101  |
| 3.0                 | 4192                             | 4158 | 4478 | 87         | 86   | 93   |
| 3.5                 | 3529                             | 3301 | 3538 | 73         | 68   | 73   |
| 4.0                 | 1433                             | 1264 | 1381 | 28         | 25   | 27   |
| 4.5                 | 755                              | 729  | 782  | 14         | 13   | 14   |
| 5.0                 | 727                              | 636  | 759  | 13         | 11   | 14   |
| Background          | 98                               | 87   | 107  |            |      |      |

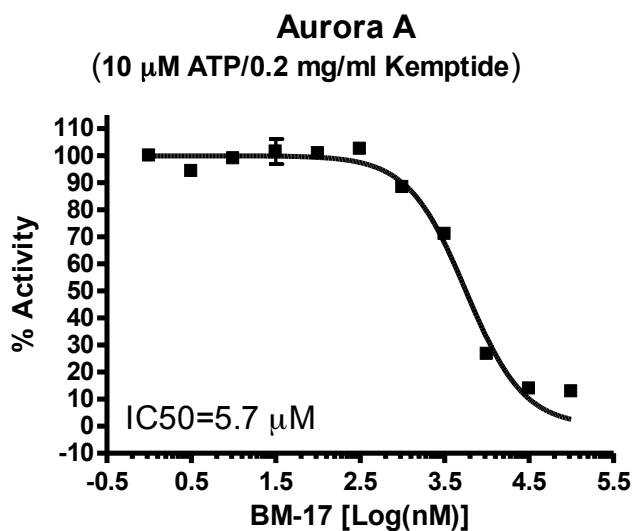

**Table S34: Data for the Effect of BM-24 (compound 15) on Kinase Activity**

| BM-24<br>(Log [nM]) | Aurora A<br>Luminescence |      |      | % Activity |      |      |
|---------------------|--------------------------|------|------|------------|------|------|
|                     | Set1                     | Set2 | Set3 | Set1       | Set2 | Set3 |
| No Compound         | 4370                     | 4017 | 4234 | 104        | 95   | 101  |
| 0                   | 3984                     | 4087 | 4270 | 95         | 97   | 102  |
| 1.0                 | 4279                     | 4321 | 4304 | 102        | 103  | 102  |
| 1.5                 | 4400                     | 4424 | 4509 | 105        | 105  | 107  |
| 2.0                 | 4134                     | 4490 | 4575 | 98         | 107  | 109  |
| 2.5                 | 4316                     | 4311 | 4496 | 103        | 103  | 107  |
| 3.0                 | 3883                     | 4284 | 4117 | 92         | 102  | 98   |
| 3.5                 | 2811                     | 3127 | 2989 | 66         | 73   | 70   |
| 4.0                 | 1941                     | 2086 | 2077 | 44         | 48   | 48   |
| 4.5                 | 876                      | 868  | 916  | 18         | 18   | 19   |
| 5.0                 | 577                      | 577  | 594  | 11         | 11   | 11   |
| Background          | 138                      | 145  | 151  |            |      |      |

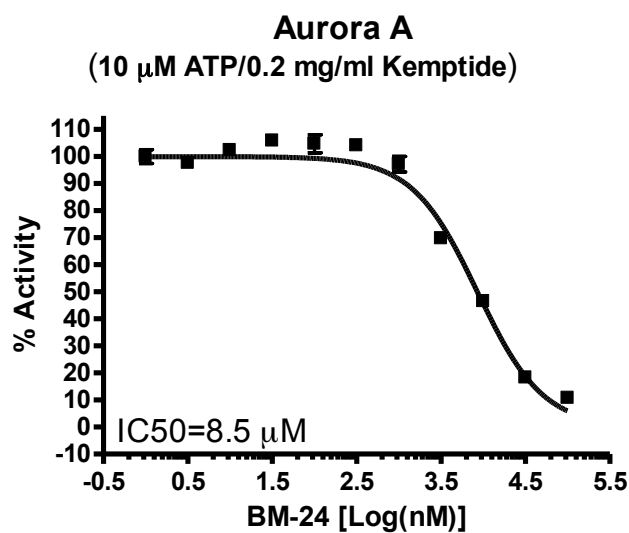

**Table S35: Data for the Effect of RS-48 (compound 16) on Kinase Activity**

| RS-48<br>(Log [nM]) | Aurora A<br>Luminescence |      |      | % Activity |      |      |
|---------------------|--------------------------|------|------|------------|------|------|
|                     | Set1                     | Set2 | Set3 | Set1       | Set2 | Set3 |
| No Compound         | 5639                     | 5518 | 5756 | 100        | 98   | 102  |
| 0                   | 5322                     | 5167 | 5357 | 94         | 91   | 95   |
| 1.0                 | 5072                     | 5097 | 5543 | 90         | 90   | 98   |
| 1.5                 | 4873                     | 5105 | 5307 | 86         | 90   | 94   |
| 2.0                 | 4807                     | 4865 | 5322 | 85         | 86   | 94   |
| 2.5                 | 4763                     | 4987 | 5286 | 84         | 88   | 94   |
| 3.0                 | 4360                     | 4787 | 4726 | 77         | 85   | 84   |
| 3.5                 | 3307                     | 3405 | 3314 | 58         | 60   | 58   |
| 4.0                 | 2601                     | 2406 | 2630 | 45         | 42   | 46   |
| 4.5                 | 3187                     | 3466 | 3670 | 56         | 61   | 64   |
| 5.0                 | 3167                     | 3298 | 3643 | 55         | 58   | 64   |
| Background          | 110                      | 100  | 103  |            |      |      |

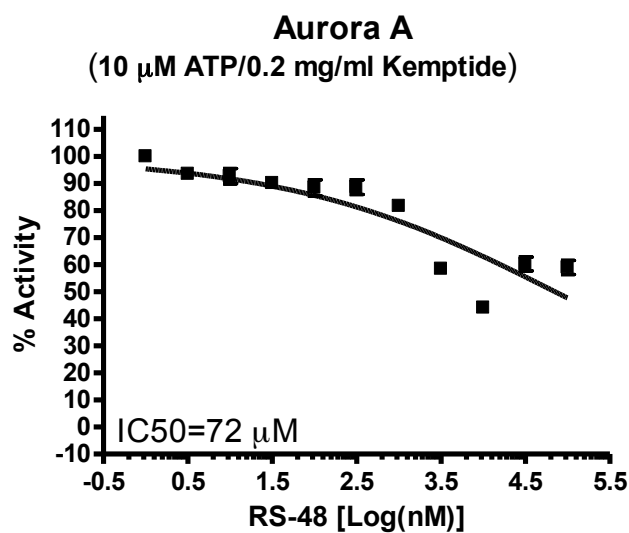

**Table S36: Data for the Effect of BM-23 (compound 17) on Kinase Activity**

| BM-23<br>(Log [nM]) | AuroraA Activity<br>Luminescence |      |      | % Activity |      |      |
|---------------------|----------------------------------|------|------|------------|------|------|
|                     | Set1                             | Set2 | Set3 | Set1       | Set2 | Set3 |
| No Compound         | 4863                             | 4877 | 5271 | 97         | 97   | 105  |
| 0                   | 4998                             | 4727 | 4671 | 100        | 94   | 93   |
| 1.0                 | 4852                             | 4880 | 4833 | 97         | 97   | 97   |
| 1.5                 | 5131                             | 4948 | 5289 | 103        | 99   | 106  |
| 2.0                 | 4851                             | 5011 | 4906 | 97         | 100  | 98   |
| 2.5                 | 5093                             | 4820 | 4740 | 102        | 96   | 95   |
| 3.0                 | 3856                             | 4095 | 3994 | 77         | 81   | 79   |
| 3.5                 | 3297                             | 3208 | 3170 | 65         | 63   | 63   |
| 4.0                 | 2374                             | 2142 | 2242 | 46         | 42   | 44   |
| 4.5                 | 2130                             | 2031 | 2019 | 41         | 39   | 39   |
| 5.0                 | 1738                             | 1784 | 1649 | 34         | 34   | 32   |
| Background          | 93                               | 95   | 89   |            |      |      |

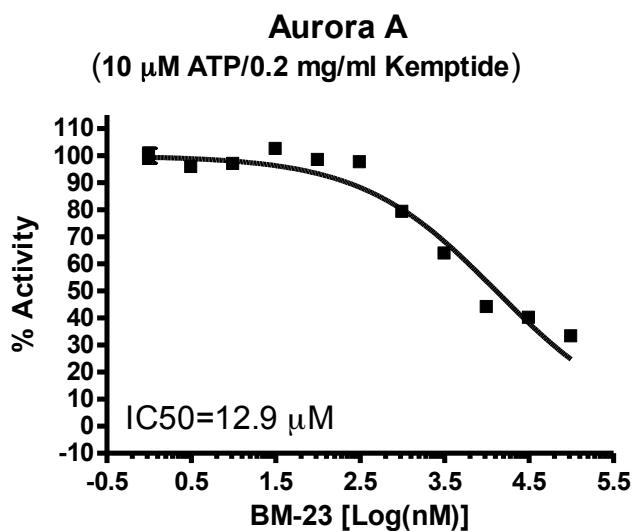

**Table S37: Data for the Effect of SZ-34 (compound 18) on Kinase Activity**

| SZ-34<br>(Log [nM]) | Aurora A<br>Luminescence |      |      | % Activity |      |      |
|---------------------|--------------------------|------|------|------------|------|------|
|                     | Set1                     | Set2 | Set3 | Set1       | Set2 | Set3 |
| No Compound         | 6175                     | 5774 | 5749 | 105        | 98   | 97   |
| 0                   | 6502                     | 5506 | 6122 | 110        | 93   | 104  |
| 1.0                 | 6071                     | 5505 | 5958 | 103        | 93   | 101  |
| 1.5                 | 6174                     | 5661 | 6189 | 105        | 96   | 105  |
| 2.0                 | 6071                     | 5522 | 5887 | 103        | 93   | 100  |
| 2.5                 | 5338                     | 5074 | 5472 | 90         | 86   | 93   |
| 3.0                 | 4583                     | 4351 | 5029 | 77         | 73   | 85   |
| 3.5                 | 3037                     | 2695 | 2850 | 51         | 45   | 47   |
| 4.0                 | 1970                     | 1823 | 1902 | 32         | 30   | 31   |
| 4.5                 | 1784                     | 1589 | 1644 | 29         | 26   | 26   |
| 5.0                 | 1824                     | 1589 | 1623 | 30         | 26   | 26   |
| Background          | 104                      | 109  | 127  |            |      |      |

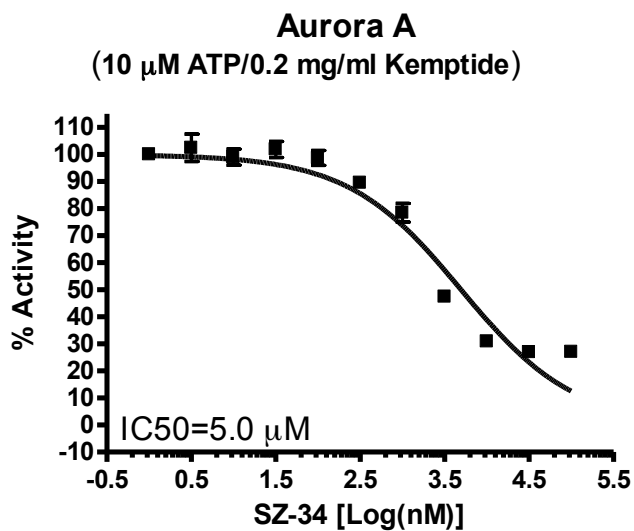

**Table S38: Data for the Effect of Staurosporine on AURKA Activity**

| Staurosporine<br>(Log [nM]) | AuroraA Activity<br>Luminescence |      |      | % Activity |      |      |
|-----------------------------|----------------------------------|------|------|------------|------|------|
|                             | Set1                             | Set2 | Set3 | Set1       | Set2 | Set3 |
| No Compound                 | 4725                             | 4805 | 5039 | 97         | 99   | 104  |
| -1.0                        | 4868                             | 4529 | 4954 | 100        | 93   | 102  |
| -0.5                        | 4781                             | 4837 | 4938 | 98         | 100  | 102  |
| 0                           | 5302                             | 4980 | 5271 | 109        | 103  | 109  |
| 1.0                         | 4961                             | 4893 | 4971 | 102        | 101  | 102  |
| 1.5                         | 3565                             | 3380 | 4147 | 73         | 69   | 85   |
| 2.0                         | 484                              | 544  | 472  | 8          | 9    | 8    |
| 2.5                         | 232                              | 239  | 224  | 3          | 3    | 3    |
| 3.0                         | 178                              | 183  | 227  | 2          | 2    | 3    |
| 3.5                         | 194                              | 185  | 204  | 2          | 2    | 2    |
| 4.0                         | 179                              | 176  | 178  | 2          | 2    | 2    |
| Background                  | 102                              | 90   | 96   |            |      |      |

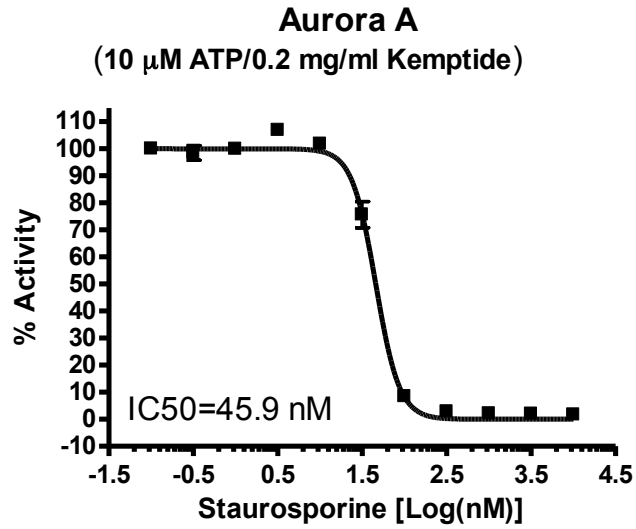



## Binding Affinities for EGFR, AURKA and AURKB

The assay was performed externally at DiscoverX Corporation using a competition binding assay that quantitatively measures the ability of a compound to compete with an immobilized, active-site directed ligand for target kinases AURKA, AURKB and EGFR.<sup>23</sup> The assay is performed by combining three components: DNA-tagged kinase; immobilized ligand; and a test compound. The ability of the test compound to compete with the immobilized ligand was measured via quantitative PCR of the DNA tag. An 11-point 3-fold serial dilution of each test compound was prepared in 100% DMSO at 100x final test concentration and subsequently diluted to 1x in the assay (final DMSO concentration = 1%). Compound Kds were determined using a compound top concentration = 30,000 nM. If the initial Kd determined was < 0.5 nM (the lowest concentration tested), the measurement was repeated with a serial dilution starting at a lower top concentration. Binding constants (Kds) were calculated with a standard dose-response curve using the Hill equation.

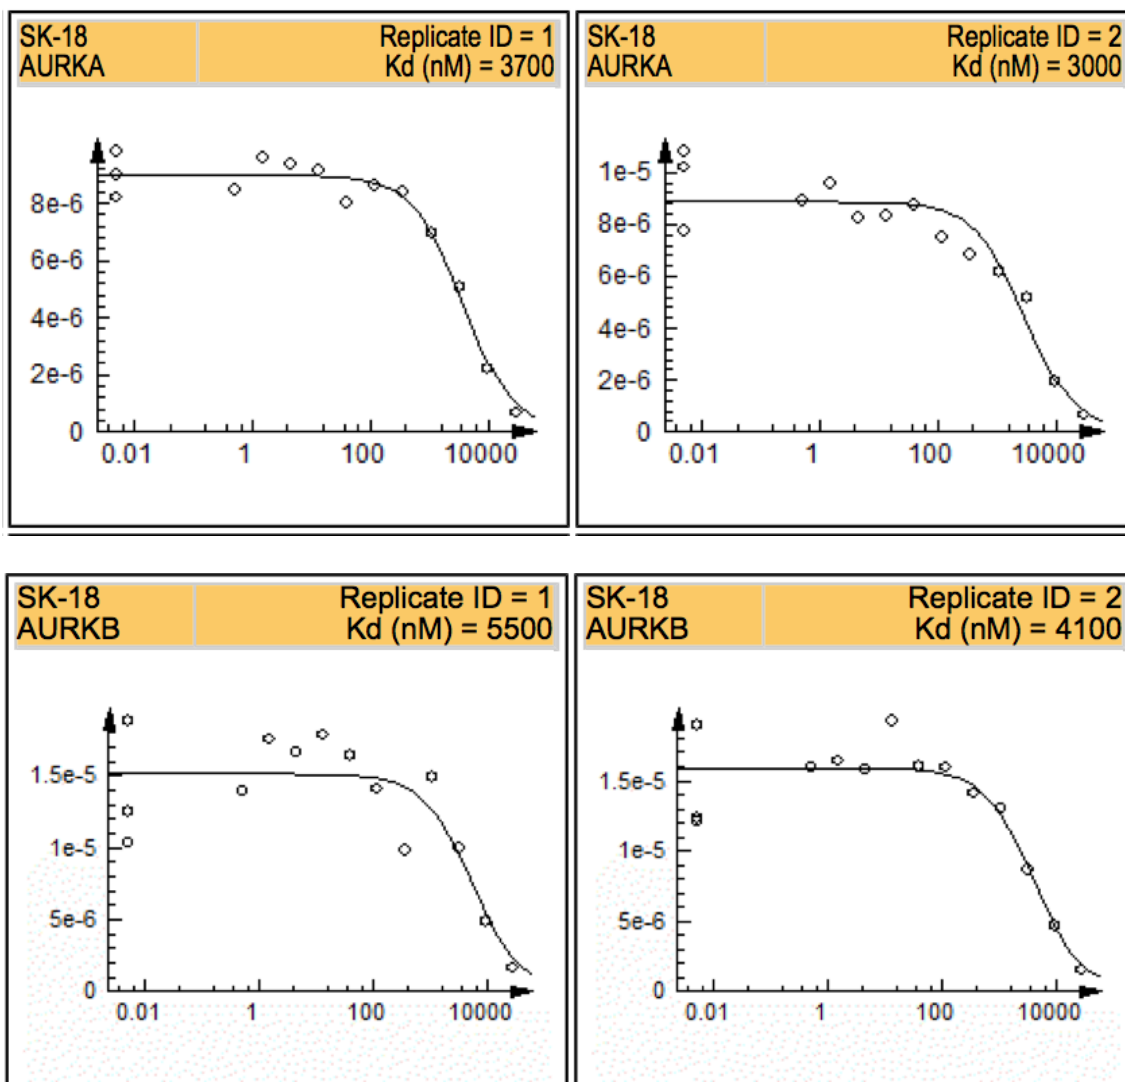

SK-18 EGFR  
Replicate ID = 1  
Kd (nM) = 76

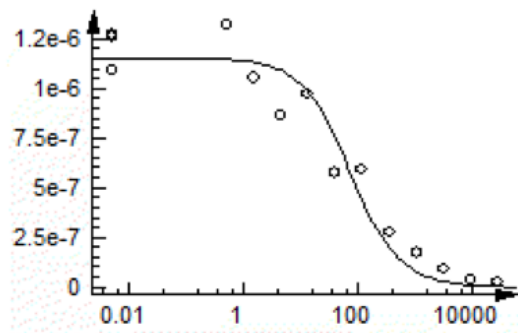

SK-18 EGFR  
Replicate ID = 2  
Kd (nM) = 58

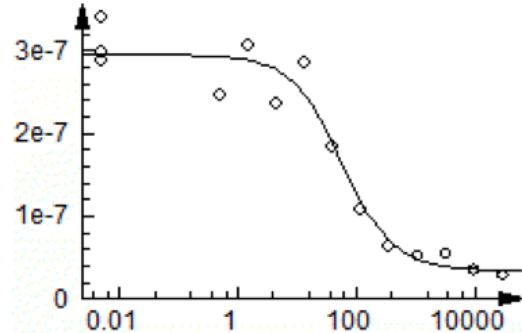

Supplement: IENZ_A_1376666_SM9173.pdf [file IENZ_A_1376666_SM9173.pdf]
